# Supplementary material
Source: publisher figshare collection journal article supplement (https://acs.figshare.com/ndownloader/files/23528427)
Supplement: Supplementary file 1 [file 23528427]

|                          |                                                                                                                                                                                                                                                                                                                                                                                                                                                                                                                                                 |
|--------------------------|-------------------------------------------------------------------------------------------------------------------------------------------------------------------------------------------------------------------------------------------------------------------------------------------------------------------------------------------------------------------------------------------------------------------------------------------------------------------------------------------------------------------------------------------------|
| Complete List of Authors | <p>Wang, Yongtian; Shanghai Institute of Applied Physics, Chinese Academy of Sciences; University of Chinese Academy of Sciences</p> <p>Han, Changcai; Shanghai Institute of Applied Physics, Chinese Academy of Sciences; University of Chinese Academy of Sciences</p> <p>Fei, Zejie; Shanghai Institute of Applied Physics, Chinese Academy of Sciences</p> <p>Dong, Changwu; Shanghai Institute of Applied Physics, Chinese Academy of Sciences</p> <p>Liu, Hongtao; Shanghai Institute of Applied Physics, Chinese Academy of Sciences</p> |
| Manuscript Title         | Probing the Hydrogen Bonding in Microsolvated Clusters of $\text{Au}_{1,2}^-(\text{Solv})_n$ (Solv= $\text{C}_2\text{H}_5\text{OH}$ , $n\text{-C}_3\text{H}_7\text{OH}$ ; $n=1\text{-}3$ for $\text{Au}^-$ ; $n=1$ for $\text{Au}_2^-$ )                                                                                                                                                                                                                                                                                                        |
| Number of Pages          | 3                                                                                                                                                                                                                                                                                                                                                                                                                                                                                                                                               |
| Tables                   | <p>Table S1. The electronic energy (include zero point energy correction) and Gibbs free energy difference between trans and gauche isomers for <math>\text{Au}^-(\text{C}_2\text{H}_5\text{OH})</math> under several theoretical methods.</p> <p>Table S2. The participation energy difference analysis between trans and gauche isomers of <math>\text{Au}^-(\text{C}_2\text{H}_5\text{OH})</math> complex.</p>                                                                                                                               |
| Figures                  | None                                                                                                                                                                                                                                                                                                                                                                                                                                                                                                                                            |

# Probing the Hydrogen Bonding in Microsolvated Clusters of $\text{Au}_{1,2}^-(\text{Solv})_n$ ( $\text{Solv}=\text{C}_2\text{H}_5\text{OH}$ , $n$ - $\text{C}_3\text{H}_7\text{OH}$ ; $n=1-3$ for $\text{Au}^-$ ; $n=1$ for $\text{Au}_2^-$ )

*Yongtian Wang,<sup>†,‡</sup> Changcai Han,<sup>†,‡</sup> Zejie Fei,<sup>†</sup> Changwu Dong,<sup>\*,†</sup> and Hongtao Liu<sup>\*,†</sup>*

<sup>†</sup>Key Laboratory of Interfacial Physics and Technology, Shanghai Institute of Applied Physics,  
Chinese Academy of Sciences, Shanghai 201800, P. R. China

<sup>‡</sup>University of Chinese Academy of Sciences, Beijing 100049, P. R. China

## Supporting Information

**Table S1.** The electronic energy (include zero point energy correction) and Gibbs free energy difference between trans and gauche isomers for Au<sup>-</sup>(C<sub>2</sub>H<sub>5</sub>OH) under several theoretical methods.

| Relative Energy                                 | Theoretical Methods |      |        |        |       |
|-------------------------------------------------|---------------------|------|--------|--------|-------|
|                                                 | mPW2PLYP            | MP2  | B3LYP  | B3PW91 | HF    |
| $\Delta E_{\text{ZPE}}^{\text{a}}$ (kcal/mol)   | 0.28                | 1.19 | -0.014 | 0.065  | -0.31 |
| $\Delta E_{\text{Gibbs}}^{\text{b}}$ (kcal/mol) | 0.010               | 0.67 | -0.18  | -0.15  | -0.39 |

<sup>a</sup> The total electronic energy difference including ZPE correction,  $\Delta E_{\text{ZPE}} = E_{\text{trans}} - E_{\text{gauche}}$

<sup>b</sup> The Gibbs free energy difference,  $\Delta E_{\text{Gibbs}} = E_{\text{trans}} - E_{\text{gauche}}$ , at temperature 200 K.

In this table, there are three methods support the gauche conformer is the most stable one, the energy differences are 0.28 kcal/mol, 1.19 kcal/mol and 0.065 kcal/mol for mPW2PLYP, MP2 and B3PW91 method, respectively. Under HF and B3LYP methods, the results are different. The trans conformer is more stable than gauche conformer by 0.31 kcal/mol for HF method. For B3LYP method, electronic energies of both conformers are almost the same, the difference is only 0.014 kcal/mol. However, if the zero-point energy (ZPE) correction is not included, for B3LYP method, the total electronic energy of gauche isomer is lower than trans one by 0.003 kcal/mol. However, when the thermal correction of free energy is considered, the relative stability of these two conformer is changed in B3PW91 method.

In order to understand the energies difference between trans and gauche isomers, the total electronic energy analysis was performed by decomposed to six components, that are ET, EV, EJ, EK, Ec and ENuc, respectively. The difference of every energy component between trans and

gauche isomer was calculated under various theoretical methods, the calculation results were list in Table S2. In these energy components, the ET term is the electronic kinetic energy, the EV term is the electron-nucleus attraction energy, the EJ term is the coulomb term of electrons, EK term is the electronic exchange energy, Ec term is the correlation energy correction, and Etot is total electronic energy which include the correlation energy correction. In additional, ENTVJK term is the sum of ET, EV, EJ, EK and ENuc.

**Table S2.** The participation energy difference analysis between tans and gauche isomers of  $\text{Au}^-(\text{C}_2\text{H}_5\text{OH})$  complex.

| Theoretical methods | Energy difference terms $\Delta E^a$ (kcal/mol) |                    |                    |                    |                    |                    |                        |                      |
|---------------------|-------------------------------------------------|--------------------|--------------------|--------------------|--------------------|--------------------|------------------------|----------------------|
|                     | $\Delta \text{ENuc}$                            | $\Delta \text{ET}$ | $\Delta \text{EV}$ | $\Delta \text{EJ}$ | $\Delta \text{EK}$ | $\Delta \text{Ec}$ | $\Delta \text{ENTVJK}$ | $\Delta \text{Etot}$ |
| HF                  | -1953.17                                        | 1.12               | 3969.79            | -2017.72           | -0.30              | 0.00               | -0.28                  | -0.28                |
| MP2                 | -3744.07                                        | -0.83              | 7588.92            | -3846.12           | 0.76               | 2.66               | -1.35                  | 1.31                 |
| mPW2PLYP            | -2973.25                                        | 0.58               | 6035.66            | -3063.48           | -0.02              | 0.80               | -0.51                  | 0.36                 |
| B3LYP               | -2456.92                                        | 0.68               | 4989.76            | -2533.32           | -0.41              | 0.26               | -0.21                  | 0.05                 |
| B3PW91              | -2633.13                                        | 0.89               | 5346.99            | -2714.46           | -0.56              | 0.40               | -0.27                  | 0.14                 |

<sup>a</sup>  $\Delta E = E_{\text{trans}} - E_{\text{gauch}}$

As shown in Table S2, if do not consider the Ec term, the electronic energy of trans isomer is lower than gauche one under all the theoretical method here, the results are list the  $\Delta \text{ENTVJK}$  column. When the Ec term is included, the results are converted. It is probably that the electrons correlation interaction, which maybe include dispersion force, or hyperconjugation effect, determined the gauche conformer is more stable than trans one in the  $\text{Au}^-(\text{C}_2\text{H}_5\text{OH})$  complex. Hartree-Fock method is not reliable in most electronic structure analysis because the electronic correlation energy is not considered.
